# Supplementary material
Source: PubMed Central journal article supplement (PMC4149468)
Supplement: NIHMS520086-supplement-SF2.pdf [file NIHMS520086-supplement-SF2.pdf]

|                            | DMEM                       |        |  | DMEM + rCE          |        |
|----------------------------|----------------------------|--------|--|---------------------|--------|
| CPT-11 ( $\mu$ M) at start | 3                          | 15     |  | 3                   | 15     |
| Time (h)                   | CPT-11 ( $\mu$ M) measured |        |  | SN-38 (nM) measured |        |
| 0                          | 3.646                      | 14.359 |  | < 5                 | 5.377  |
| 1                          | 3.268                      | 15.864 |  | < 5                 | 12.982 |
| 2                          | 3.389                      | 13.511 |  | < 5                 | 11.839 |
| 3                          | 3.373                      | 15.363 |  | 5.79                | 10.455 |
| 4                          | 3.562                      | 14.7   |  | 5.917               | 11.342 |
| 24                         | 3.167                      | 15.811 |  | 27.118              | 53.983 |

\* rCE activity = 341 nmol/min/ml

Fig S2
