# Supplementary material
Source: PubMed Central journal article supplement (PMC4149468)

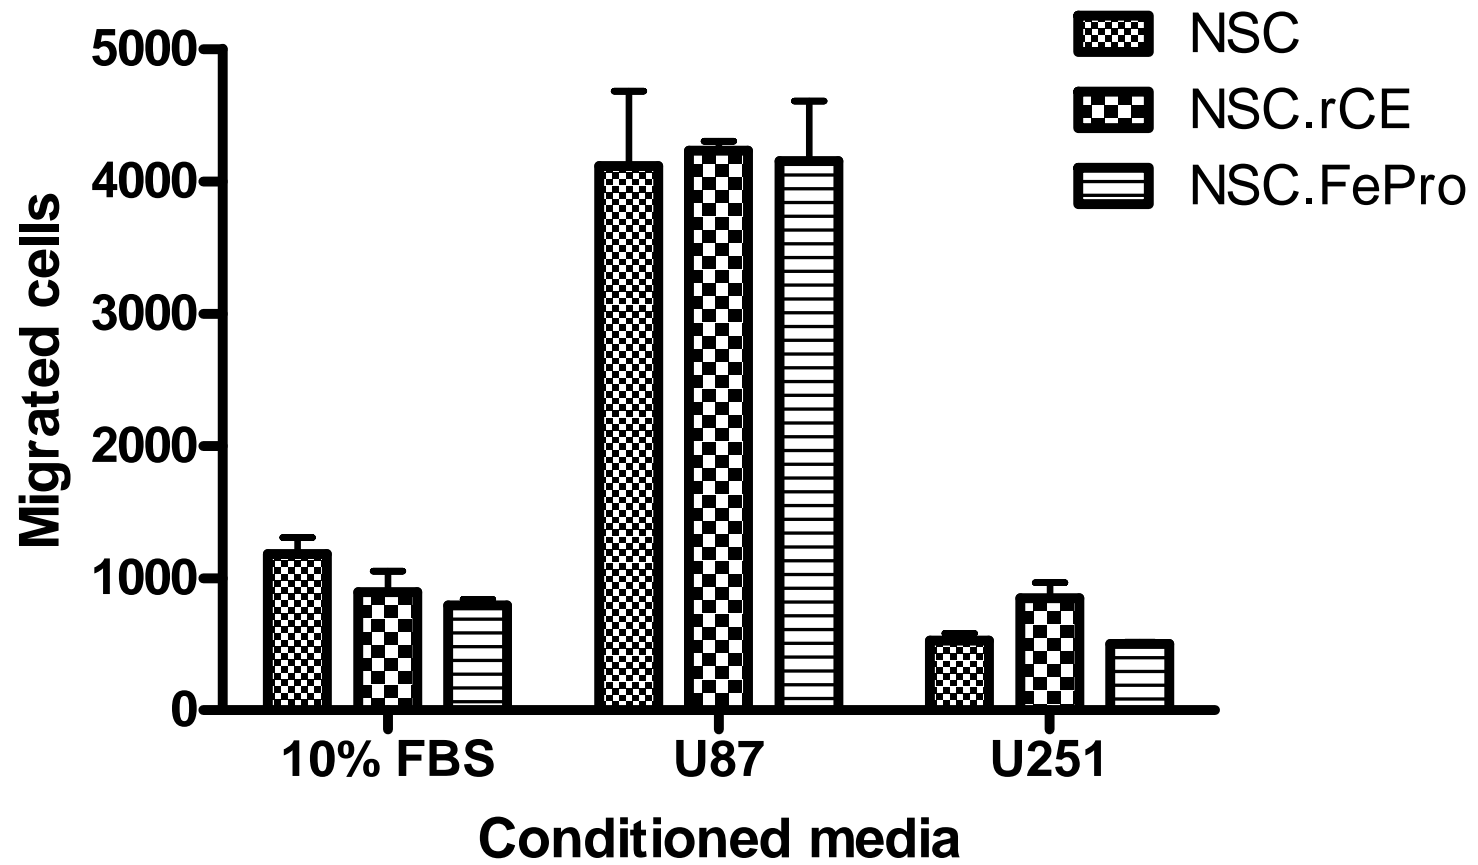

Fig S1

Supplement: NIHMS520086-supplement-SF1.pdf [file NIHMS520086-supplement-SF1.pdf]

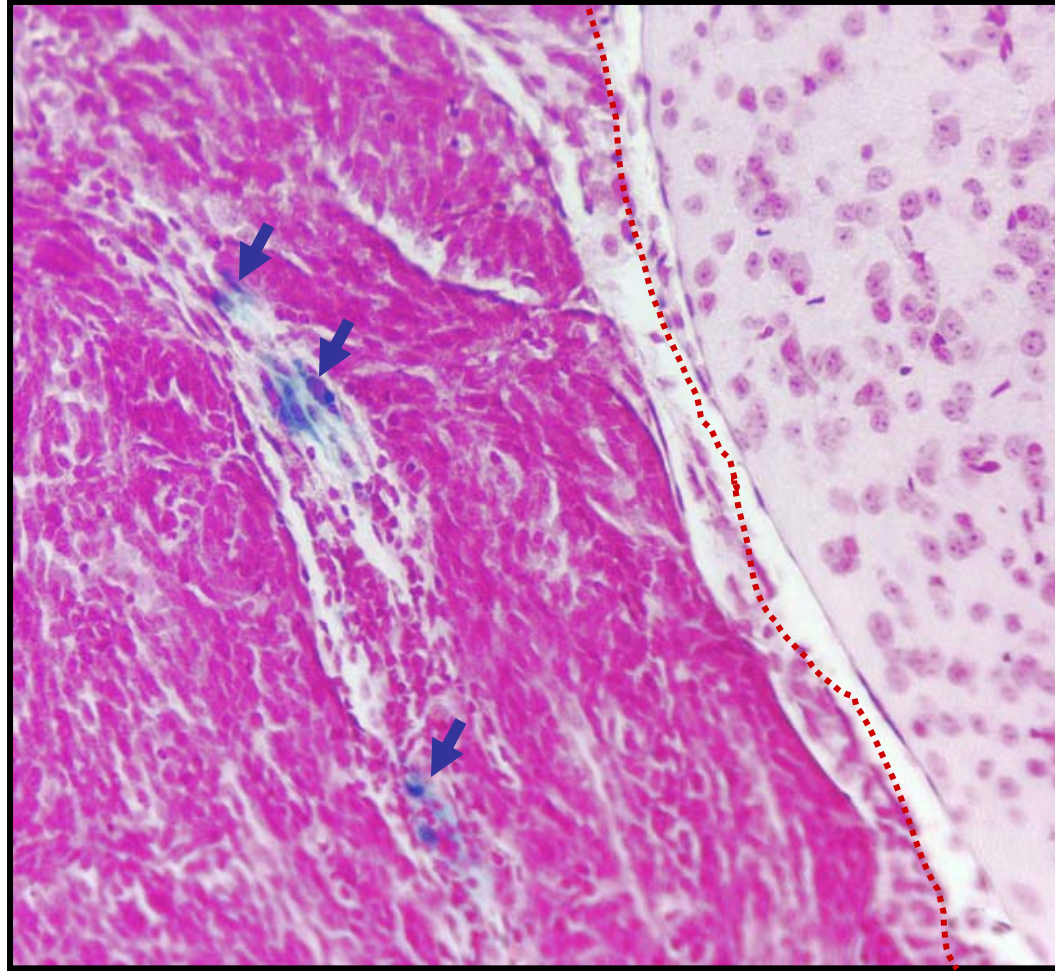

**Fig S3**

Supplement: NIHMS520086-supplement-SF3.pdf [file NIHMS520086-supplement-SF3.pdf]

Control: CPT-11 only

Treatment: NSC.rCE + CPT-11

C1

C2

T1

T2

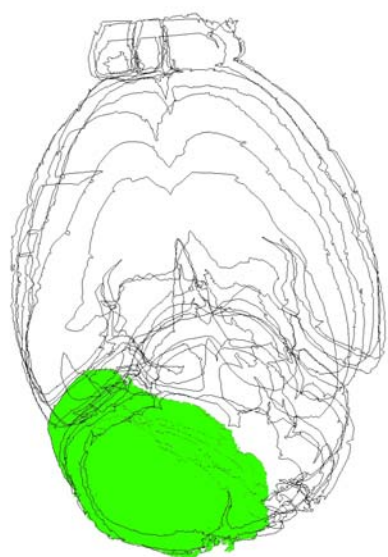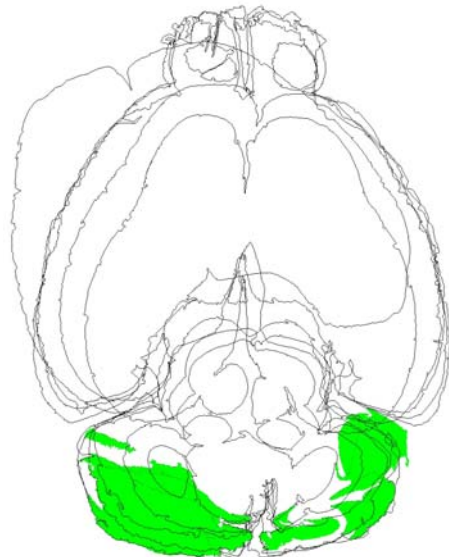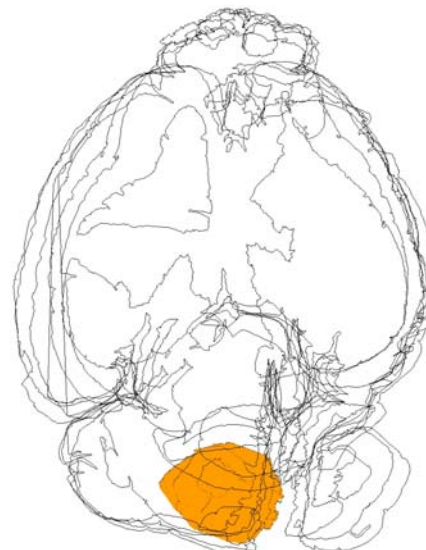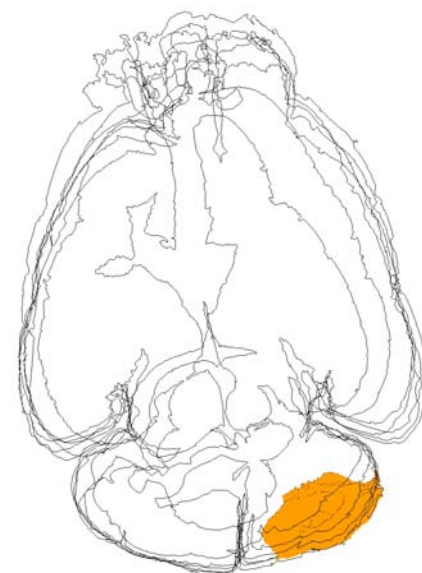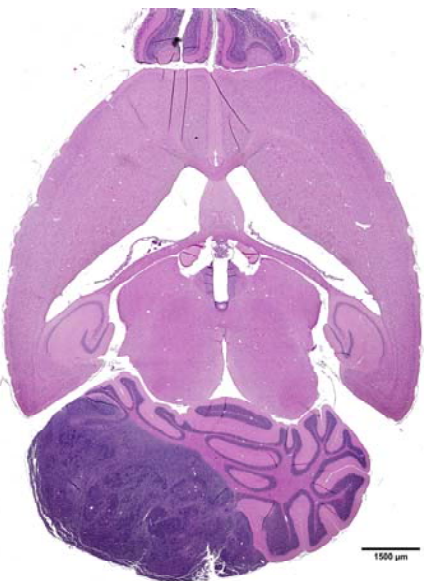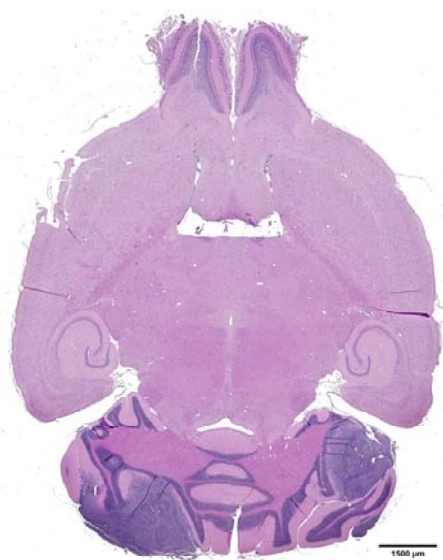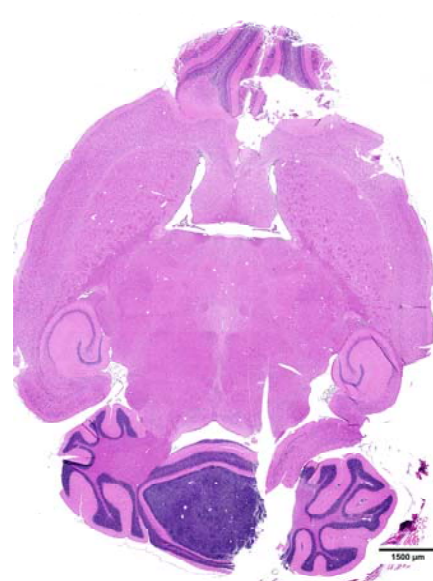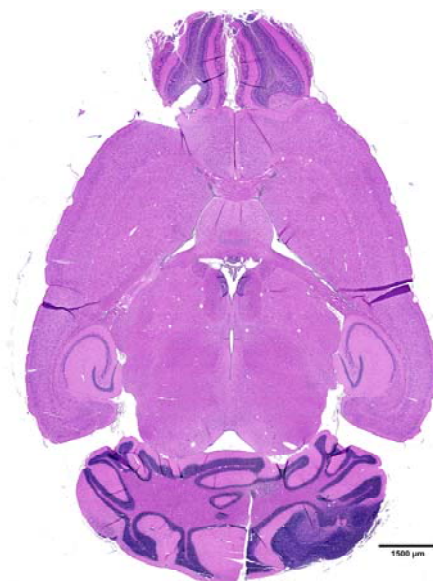

1500  $\mu$ m

1500  $\mu$ m

1500  $\mu$ m

1500  $\mu$ m

Fig S4

Supplement: NIHMS520086-supplement-SF4.pdf [file NIHMS520086-supplement-SF4.pdf]
